# Supplementary material
Source: publisher figshare collection journal article supplement (https://gsajournals.figshare.com/ndownloader/files/21191799)
Supplement: Supplementary file 1 [file 21191799]

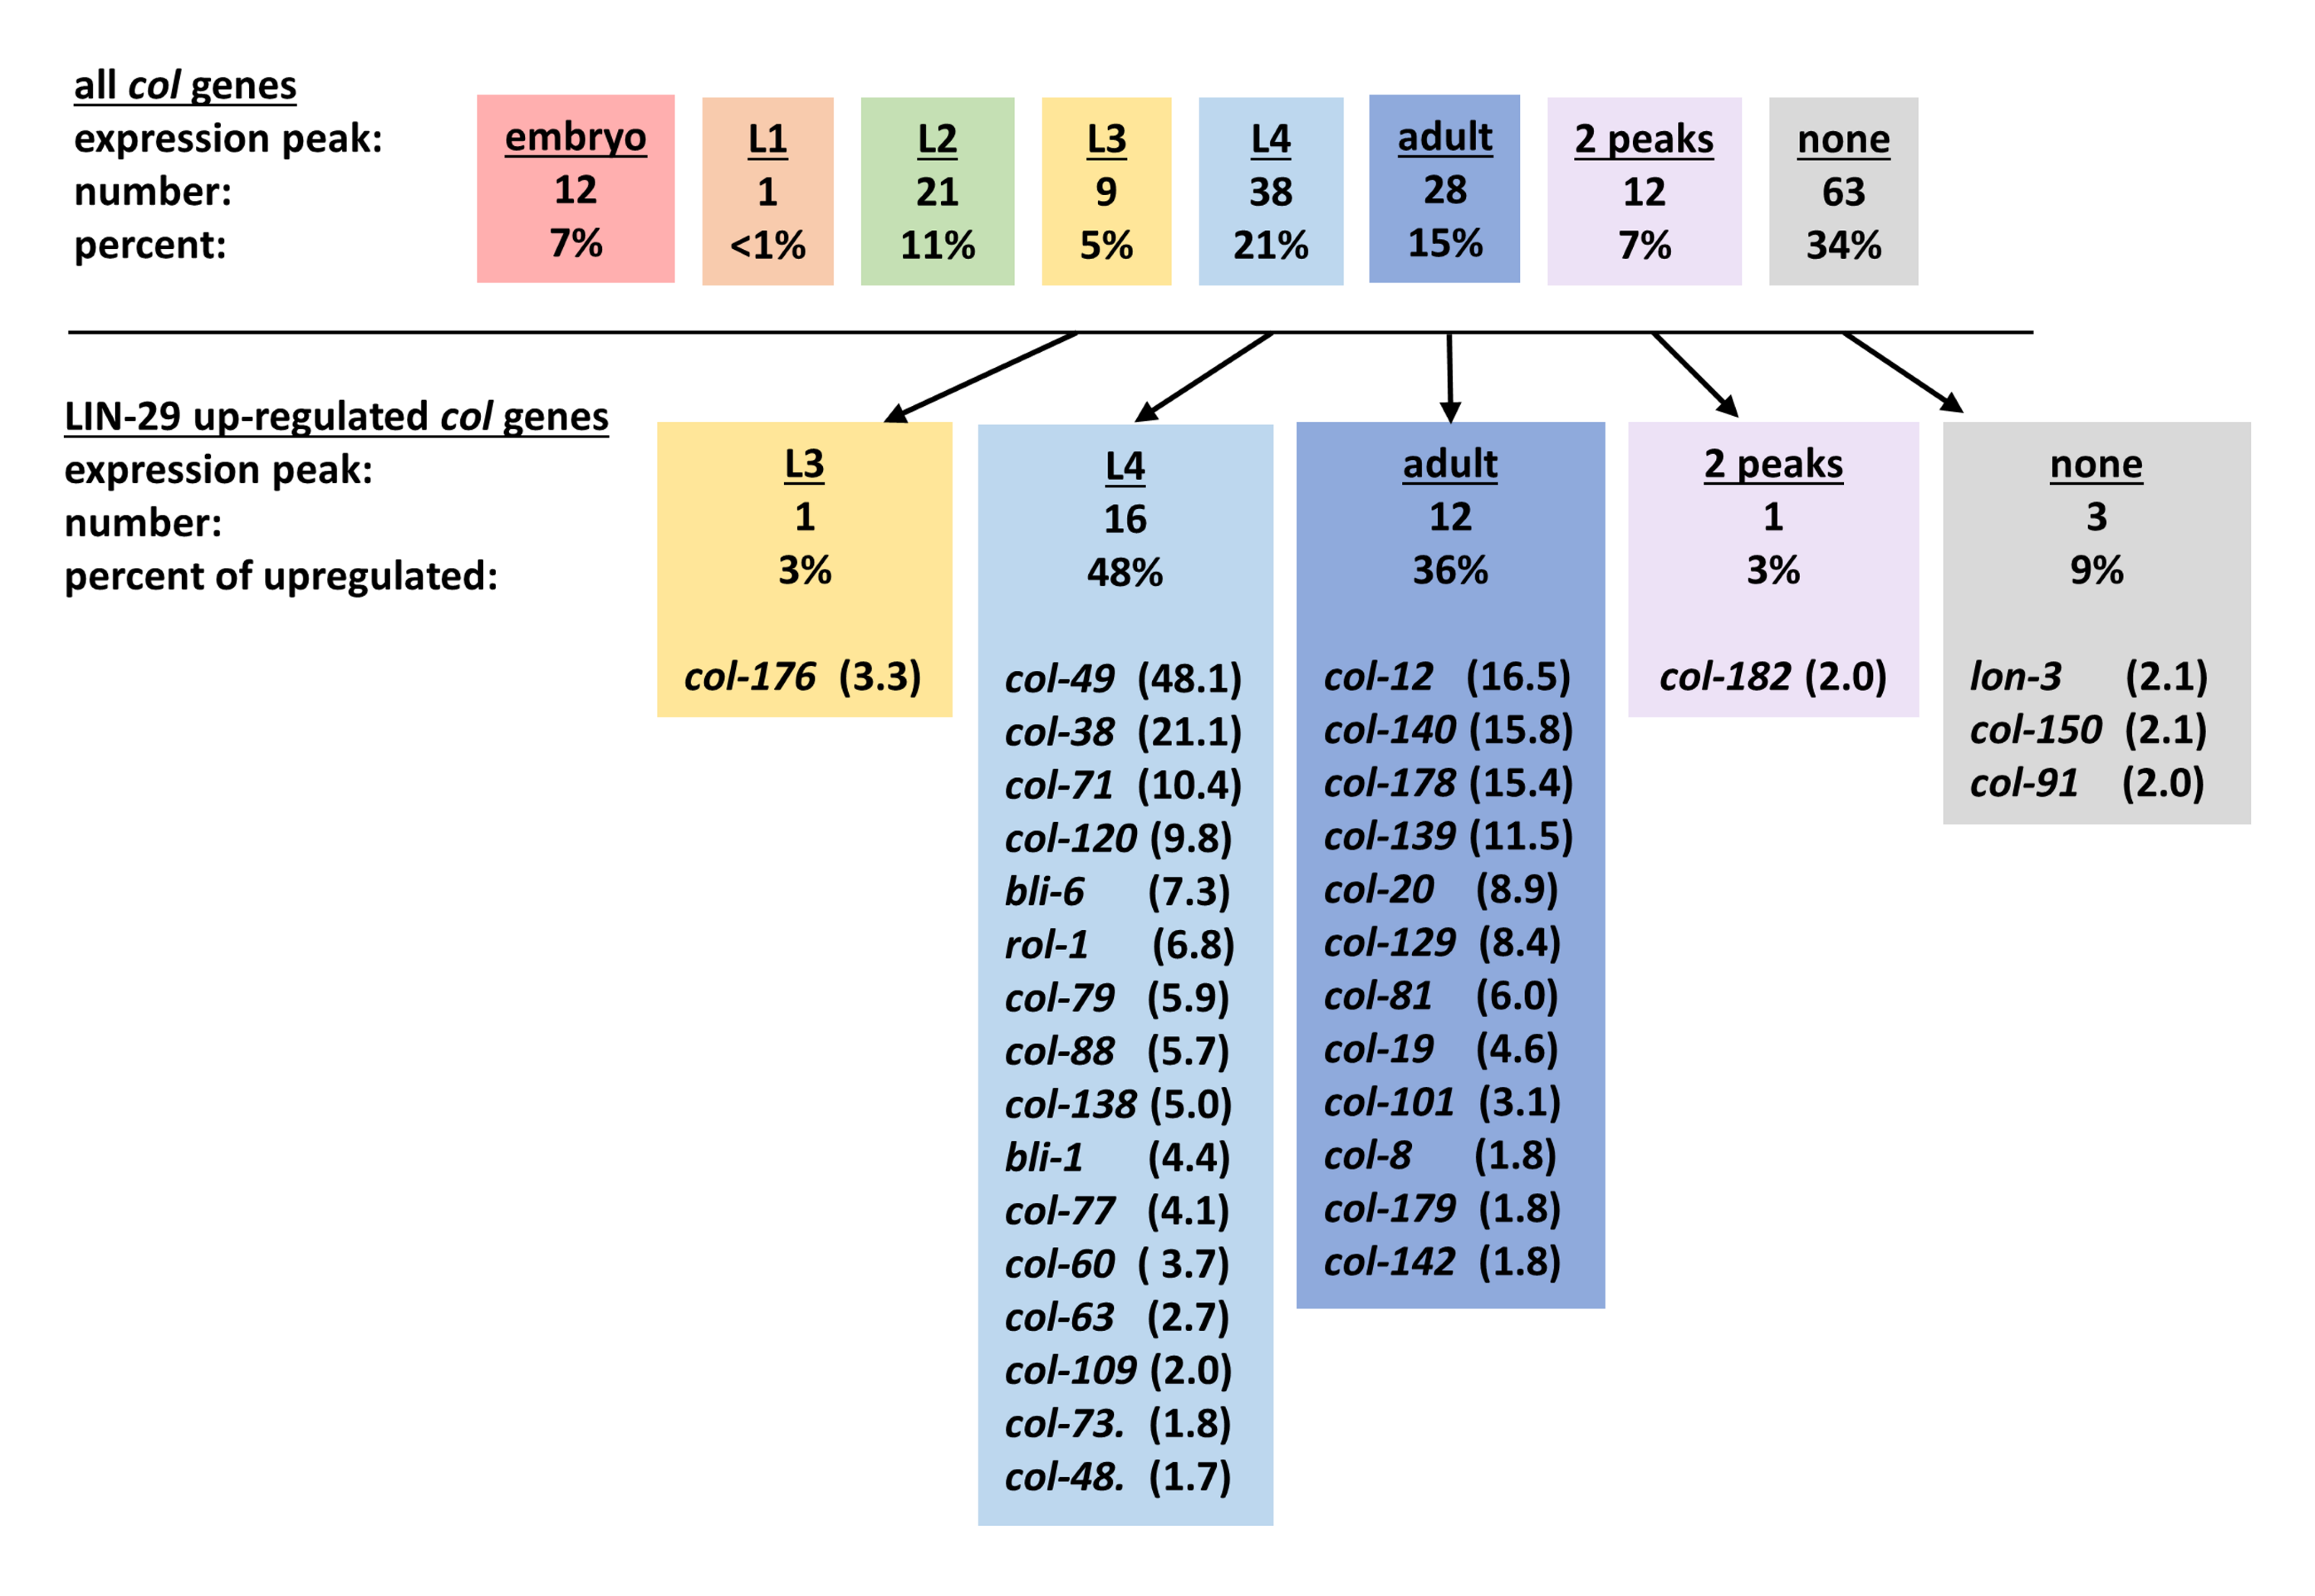


**Figure S6. Most LIN-29-up-regulated cuticle collagen genes normally express in the L4 and adult stages.** Developmental expression data from the modENCODE project (Gerstein *et al.* 2010) was used to determine the total amount of expression for each cuticle *col* genes, and the amount of that expression found in each of six developmental times (late embryo, L1-L4, adult). Genes that showed >50% of their total expression in any single stage were classified as having a peak in that stage (see (Jackson *et al.* 2014)). Genes that showed peaks of expression in two stages but less than 10% of total expression in all other stages were classified as ‘2 peaks’ (eg., L2/L4, L2/Ad, etc). The remaining genes that did not fit into these categories are classified as ‘none’ (no peak). Above the line is shown the distribution of times of expression for 184 cuticle *col* genes; below the line are the 33 cuticle *col* genes up-regulated upon LIN-29 ectopic expression.
